# Supplementary material for: Efficient screening of groundwater head monitoring data for anthropogenic effects and measurement errors
Source: Copernicus journal article supplement (doi:10.5194/hess-24-501-2020), 2020-02-03
Supplement: Supplementary file 1 [file hess-24-501-2020-supplement.pdf]

Supplement of Hydrol. Earth Syst. Sci., 24, 501–513, 2020  
<https://doi.org/10.5194/hess-24-501-2020-supplement>  
© Author(s) 2020. This work is distributed under  
the Creative Commons Attribution 4.0 License.

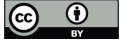

*Supplement of*

## **Efficient screening of groundwater head monitoring data for anthropogenic effects and measurement errors**

**Christian Lehr and Gunnar Lischeid**

*Correspondence to:* Christian Lehr (lehr@zalf.de)

The copyright of individual parts of the supplement might differ from the CC BY 4.0 License.

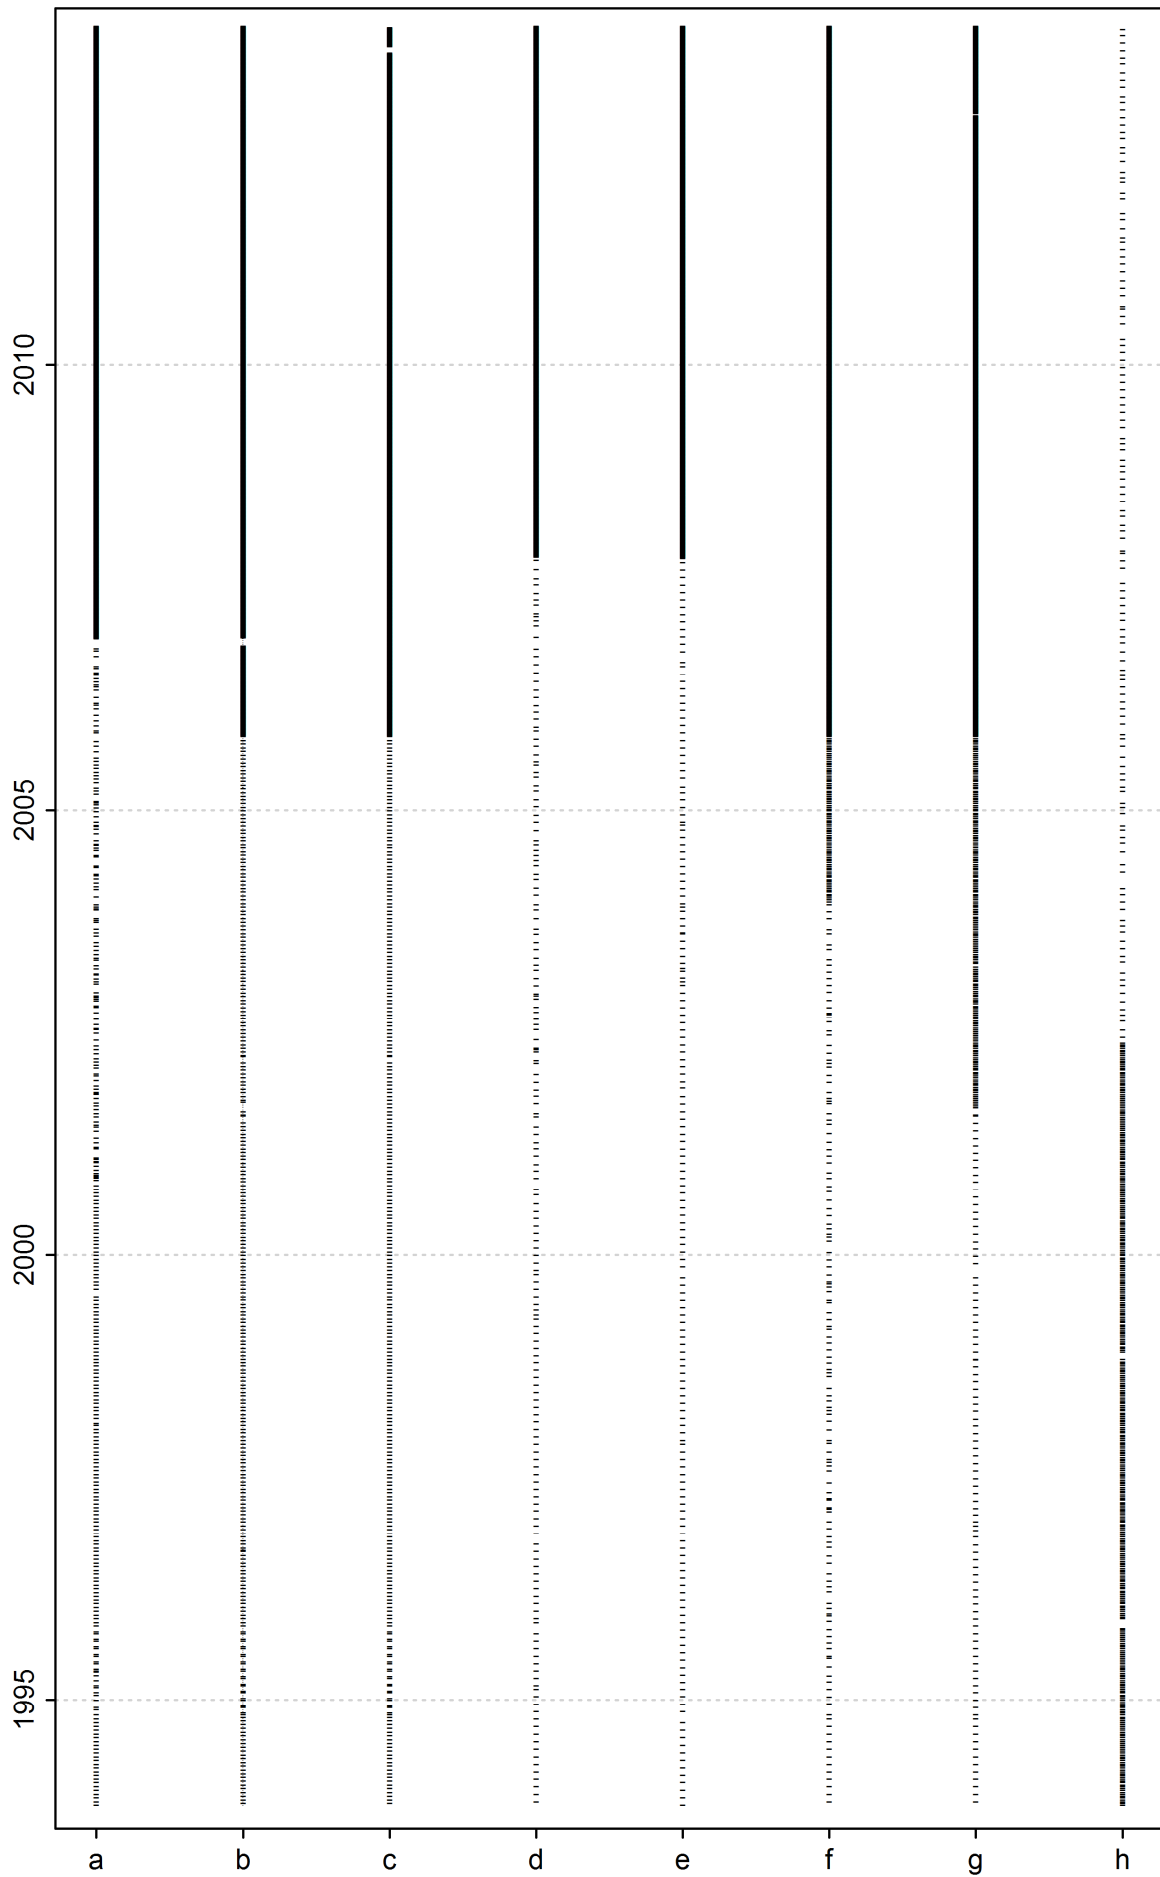

Figure S1 Dates of reading of groundwater head of the eight series which exhibited marked deviations from the quasi-weekly reading interval. Daily reading intervals appear as black solid line.

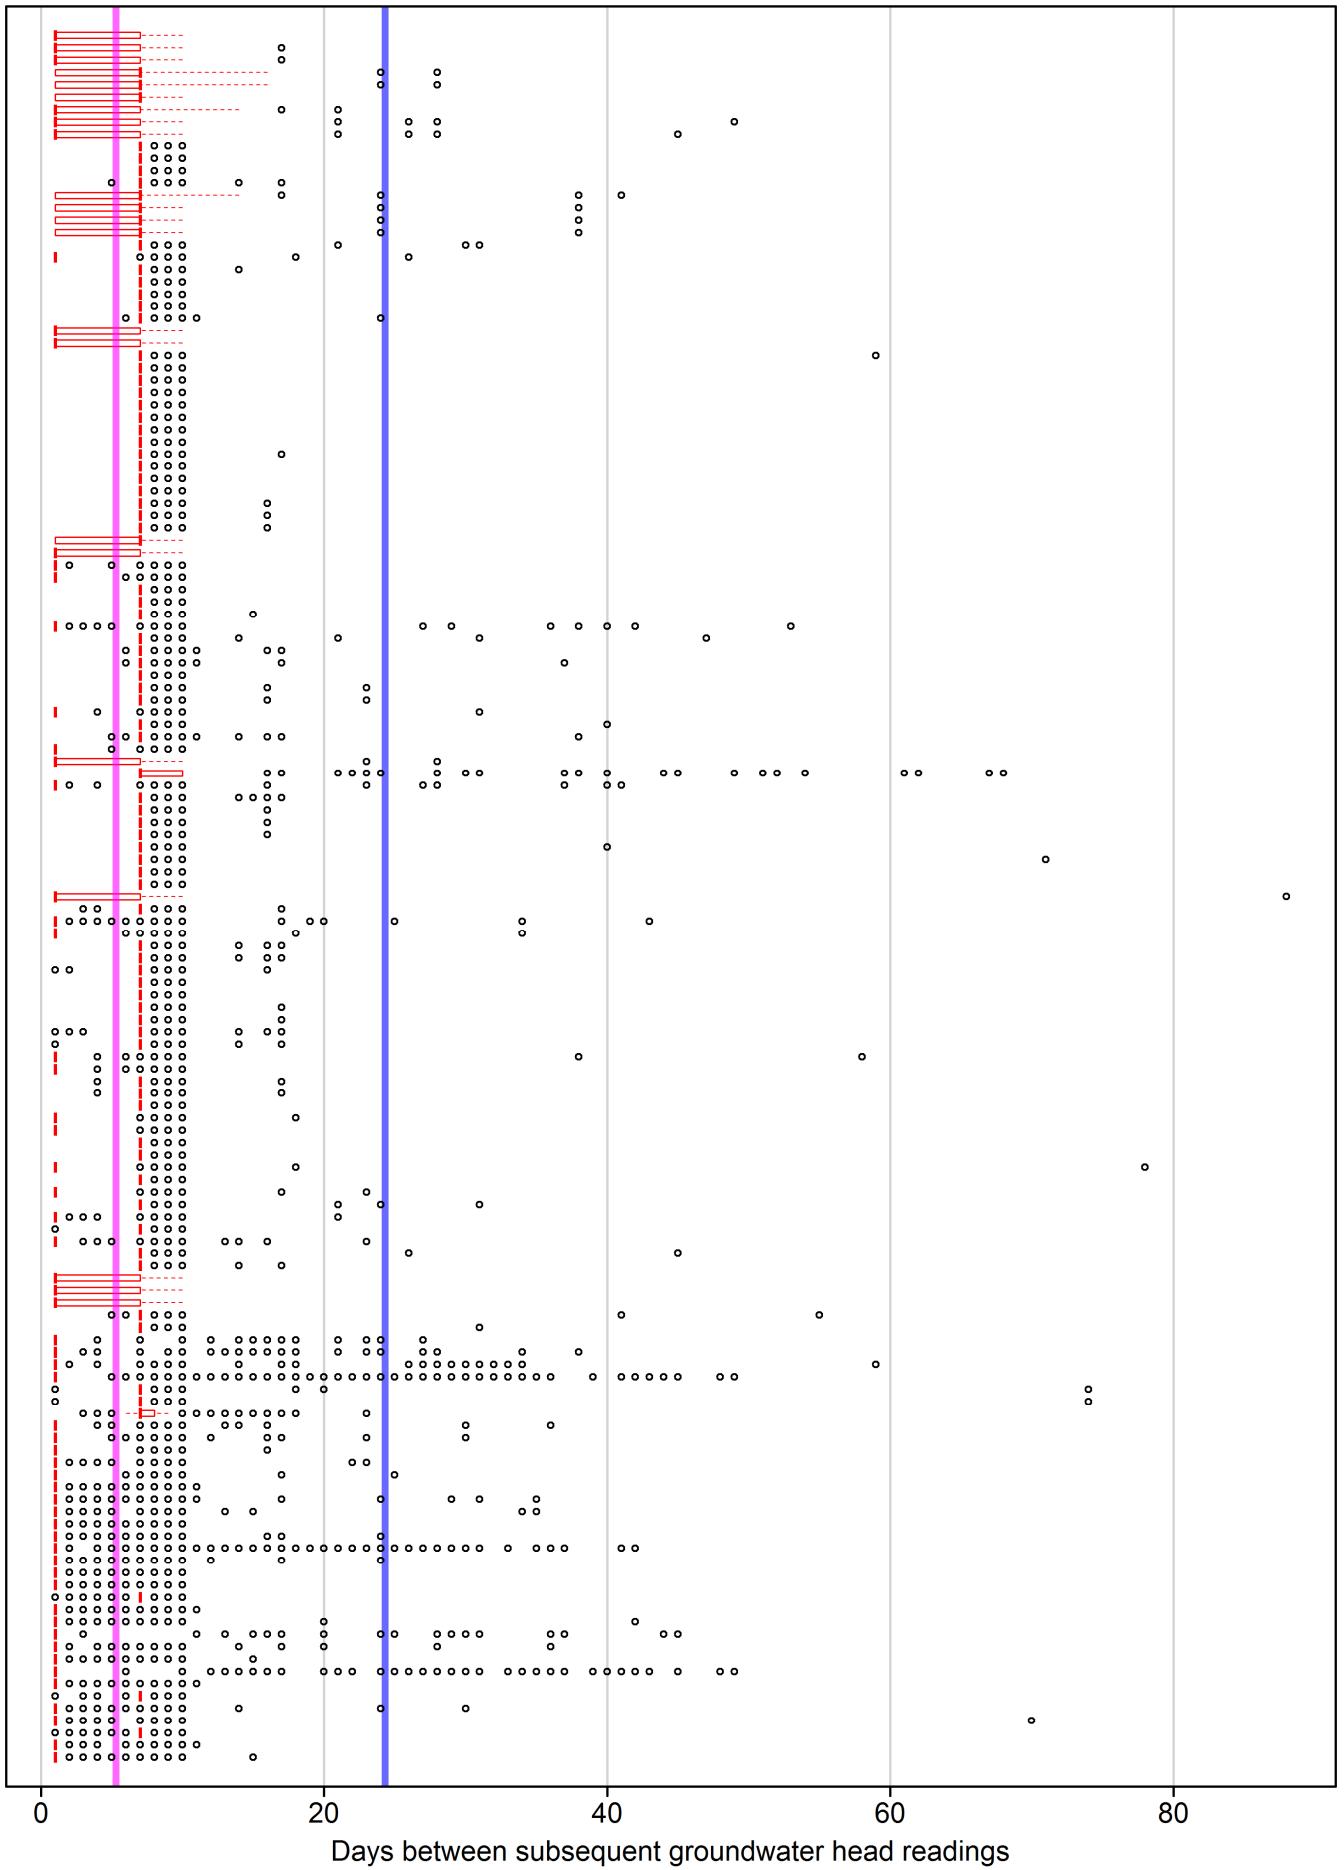

Figure S2 Red: Boxplots of the number of days between subsequent readings in the 141 observed groundwater head series before the interpolation. Black circles: Outliers. Blue solid line: mean of the maxima of measurement intervals of all series. Magenta solid line: mean of the mean of measurement intervals of all series.
